# Supplementary material for: Risk Signature of Cancer-Associated Fibroblast–Secreted Cytokines Associates With Clinical Outcomes of Breast Cancer
Source: Front Oncol. 2021 Jul 28;11:628677. doi: 10.3389/fonc.2021.628677 (PMC8356635; doi:10.3389/fonc.2021.628677)
Supplement: Supplementary Table 1 — Characteristics and detailed information of included datasets. [file Table_1.xlsx]

## Sheet: Table S1
Table S1. Characteristics and detailed information of included datasets
Datasets	Data type	Samples (n)	Stage	Data access
TCGA	RNA-Seq/WES+WGS	1091	IA-IV	http://www.cbioportal.org
METABRIC	Microarray/Shotgun-Seq	1904	IA-IV	http://www.cbioportal.org
GSE75688	ScRNA-Seq	11	IA-IIIC	https://www.ncbi.nlm.nih.gov/geo
Wu et al.	ScRNA-Seq	5	N.A	https://www.embopress.org/doi/abs/10.15252/embj.2019104063
GSE20685	Microarray	327	I-IV	https://www.ncbi.nlm.nih.gov/geo
GSE86166	Microarray	366	I-IIIC	https://www.ncbi.nlm.nih.gov/geo
GSE40954	Microarray/Shotgun-Seq	81	I-III	https://www.ncbi.nlm.nih.gov/geo

## Sheet: Table S2
Table S2. The ligand–receptor pairs of the five cytokines according to the annotation of CellTalker R package
Ligand.ApprovedSymbol	Receptor.ApprovedSymbol	ensembl_gene_id
EDIL3	ITGAV	ENSG00000138448
EDIL3	ITGB5	ENSG00000082781
GRP	BRS3	ENSG00000102239
GRP	GRPR	ENSG00000126010
GRP	NMBR	ENSG00000135577
IL16	CCR5	ENSG00000160791
IL16	CD4	ENSG00000010610
IL16	GRIN2C	ENSG00000161509
IL16	GRIN2D	ENSG00000105464
IL16	KCNA3	ENSG00000177272
IL16	KCND1	ENSG00000102057
IL16	KCND2	ENSG00000184408
IL16	KCNJ10	ENSG00000177807
IL16	KCNJ15	ENSG00000157551
IL16	KCNJ4	ENSG00000168135
PTN	ALK	ENSG00000171094
PTN	CDH10	ENSG00000040731
PTN	PLXNB2	ENSG00000196576
PTN	PTPRB	ENSG00000127329
PTN	PTPRS	ENSG00000105426
PTN	PTPRZ1	ENSG00000106278
PTN	SDC1	ENSG00000115884
PTN	SDC3	ENSG00000162512
TAC1	TACR1	ENSG00000115353
TAC1	TACR2	ENSG00000075073
TAC1	TACR3	ENSG00000169836

## Sheet: Table S3
Table S3. The results of correlation analysis between cytokines and inferred CAF proportions among three algorithms (P < 0.05) .
Cytokines		EPIC		xCell		MCP counter
hgnc_symbol	ensembl_gene_id	Rho	P value	Rho	P value	Rho	P value
A2M	ENSG00000175899	0.349045	4.40518e-33	0.405959	1.00904e-44	0.633898	1.2345e-124
ADAM12	ENSG00000148848	0.900783	0	0.482245	9.49259e-65	0.575415	5.06683e-98
ADAM23	ENSG00000114948	0.591511	8.32333e-105	0.465776	5.51832e-60	0.462114	1.97214e-59
ADAM28	ENSG00000042980	0.15994	5.02999e-08	0.227023	1.74276e-14	0.204626	3.89935e-12
ADCYAP1	ENSG00000141433	0.128852	9.31605e-06	0.195455	3.95061e-11	0.191685	7.71854e-11
ADIPOQ	ENSG00000181092	0.259882	1.08112e-18	0.162258	3.69159e-08	0.21054	9.30953e-13
ADM	ENSG00000148926	0.141305	1.31087e-06	0.0594805	0.0249141	0.338843	3.54353e-31
AGRN	ENSG00000188157	0.134244	4.07062e-06	0.121604	2.8926e-05	0.171807	5.12447e-09
AGT	ENSG00000135744	0.0663238	0.0140236	0.0779895	0.00503475	0.0496926	0.049984
ALB	ENSG00000163631	0.064907	0.0157935	0.193015	6.82701e-11	0.0561671	0.0314671
ALOX5AP	ENSG00000132965	0.336978	7.76475e-31	0.297094	6.52656e-24	0.411262	2.55588e-46
ANGPT1	ENSG00000154188	0.304463	2.90415e-25	0.197607	2.42459e-11	0.526785	1.17851e-79
ANGPT2	ENSG00000091879	0.383563	4.52965e-40	0.139185	2.03121e-06	0.365922	2.1578e-36
ANGPT4	ENSG00000101280	0.357376	1.08406e-34	0.367343	2.14356e-36	0.336723	8.63957e-31
ANGPTL1	ENSG00000116194	0.4818	3.90587e-65	0.493519	3.65216e-68	0.454852	2.02655e-57
ANGPTL2	ENSG00000136859	0.815874	4.6677e-263	0.537376	9.82371e-83	0.724956	8.49374e-180
ANGPTL4	ENSG00000167772	0.109856	0.000133475	0.0829442	0.00309563	0.291606	3.02949e-23
ANXA1	ENSG00000135046	0.352046	1.17477e-33	0.361522	3.10349e-35	0.675714	1.71209e-147
APOB	ENSG00000084674	0.166337	1.49842e-08	0.096617	0.000709641	0.223578	3.39917e-14
APOD	ENSG00000189058	0.214328	3.63712e-13	0.287344	1.98695e-22	0.250704	1.7422e-17
APOE	ENSG00000130203	0.140606	1.47007e-06	0.137599	2.61764e-06	0.213954	3.99325e-13
APP	ENSG00000142192	0.106892	0.000195191	0.0780382	0.00501133	0.276916	4.61065e-21
AREG	ENSG00000109321	0.190763	9.47371e-11	0.17572	2.69112e-09	0.150177	2.91591e-07
ASIP	ENSG00000101440	0.138801	1.97173e-06	0.230303	7.27687e-15	0.273325	1.50536e-20
B2M	ENSG00000166710	0.0817079	0.00338765	0.0726617	0.00826158	0.172951	4.07632e-09
BDNF	ENSG00000176697	0.10877	0.00015358	0.138532	2.25531e-06	0.0798257	0.00408318
BGN	ENSG00000182492	0.764764	1.43424e-211	0.485732	8.60732e-66	0.686325	6.56365e-154
BMP15	ENSG00000130385	0.0806367	0.00376921	0.0650475	0.0159609	0.0588803	0.0256094
BMP2	ENSG00000125845	0.20214	7.02848e-12	0.305226	3.41068e-25	0.511574	1.68245e-74
BMP3	ENSG00000152785	0.165989	1.60236e-08	0.242703	2.36948e-16	0.260372	9.29124e-19
BMP4	ENSG00000125378	0.355512	2.50742e-34	0.236018	1.53818e-15	0.180179	9.2669e-10
BMP6	ENSG00000153162	0.190793	9.4102e-11	0.276068	8.7621e-21	0.417402	8.72344e-48
BMP7	ENSG00000101144	0.263278	3.75726e-19	0.194119	5.33532e-11	0.315363	4.68642e-27
BMP8B	ENSG00000116985	0.216661	2.02037e-13	0.0918202	0.00121631	0.204916	3.63776e-12
BST1	ENSG00000109743	0.521626	7.06577e-78	0.389788	4.23568e-41	0.580592	3.66384e-100
BTLA	ENSG00000186265	0.078626	0.00459054	0.169393	9.45655e-09	0.210949	8.41876e-13
C1QA	ENSG00000173372	0.105681	0.000227357	0.152772	2.06239e-07	0.263527	3.47574e-19
C1QB	ENSG00000173369	0.132725	5.1563e-06	0.111234	0.000118353	0.25243	1.0418e-17
C1QTNF1	ENSG00000173918	0.465555	2.11304e-60	0.387213	1.53294e-40	0.595849	1.06131e-106
C3	ENSG00000125730	0.298387	2.68947e-24	0.374703	6.74602e-38	0.44119	9.15728e-54
C4B	ENSG00000224389	0.335245	1.60127e-30	0.226681	1.90717e-14	0.0560389	0.0317691
C6orf15	ENSG00000204542	0.0867641	0.00201463	0.193533	6.08163e-11	0.363436	6.82751e-36
CCL11	ENSG00000172156	0.337045	7.54763e-31	0.262533	6.56967e-19	0.264324	2.7054e-19
CCL14	ENSG00000276409	0.256669	2.89702e-18	0.418401	1.1942e-47	0.325373	9.07631e-29
CCL16	ENSG00000275152	0.183474	4.6218e-10	0.343692	7.94435e-32	0.251211	1.49849e-17
CCL17	ENSG00000102970	0.0585185	0.0263336	0.142146	1.25573e-06	0.18248	5.70873e-10
CCL19	ENSG00000172724	0.0774653	0.00513416	0.26818	1.11741e-19	0.223772	3.23059e-14
CCL2	ENSG00000108691	0.125119	1.6215e-05	0.214434	4.39412e-13	0.345283	2.26409e-32
CCL21	ENSG00000137077	0.21271	5.44593e-13	0.324681	1.98539e-28	0.33849	4.11247e-31
CCL22	ENSG00000102962	0.251718	1.2886e-17	0.238229	8.33816e-16	0.292459	2.24199e-23
CCL23	ENSG00000274736	0.12249	2.37404e-05	0.264872	3.17035e-19	0.330337	1.21442e-29
CCL24	ENSG00000106178	0.0922907	0.00110739	0.112798	9.64035e-05	0.239838	4.05889e-16
CCL26	ENSG00000006606	0.23408	2.02322e-15	0.182411	6.77229e-10	0.397032	4.91801e-43
CCL28	ENSG00000151882	0.0747557	0.00663153	0.164786	2.29364e-08	0.200704	9.84542e-12
CCL3	ENSG00000277632	0.0674787	0.01271	0.0875141	0.00193317	0.185084	3.27449e-10
CCL3L1	ENSG00000276085	0.0842653	0.00261321	0.106282	0.000222706	0.107671	0.000176796
CCL3L3	ENSG00000276085	0.0842653	0.00261321	0.106282	0.000222706	0.107671	0.000176796
CCL4	ENSG00000275302	0.0745596	0.00675353	0.126846	1.35756e-05	0.225198	2.21981e-14
CD14	ENSG00000170458	0.0503467	0.0477883	0.162487	3.53637e-08	0.315596	4.28234e-27
CD34	ENSG00000174059	0.395588	1.03781e-42	0.362166	2.31539e-35	0.443015	3.04201e-54
CD40LG	ENSG00000102245	0.130321	7.45806e-06	0.240847	4.00603e-16	0.240165	3.69962e-16
CD55	ENSG00000196352	0.396615	6.10269e-43	0.228835	1.07738e-14	0.419005	3.56988e-48
CD70	ENSG00000125726	0.211431	7.47496e-13	0.132629	5.69054e-06	0.311495	2.06754e-26
CFH	ENSG00000000971	0.654619	1.66064e-135	0.498665	9.14389e-70	0.615492	1.18481e-115
CGB8	ENSG00000213030	0.129583	8.3421e-06	0.11813	4.69751e-05	0.128636	9.6226e-06
CLCF1	ENSG00000175505	0.0542729	0.0361798	0.15944	6.22004e-08	0.0717593	0.00872483
CLEC11A	ENSG00000105472	0.653096	1.11815e-134	0.472076	8.90829e-62	0.518571	7.71689e-77
CNTN4	ENSG00000144619	0.419203	3.19652e-48	0.33759	1.0391e-30	0.307822	8.29362e-26
COL11A1	ENSG00000060718	0.698735	9.00314e-162	0.231135	5.81878e-15	0.423787	2.41333e-49
COL14A1	ENSG00000187955	0.601623	2.87808e-109	0.56963	6.61436e-95	0.491155	5.59631e-68
COL18A1	ENSG00000182871	0.521782	6.24961e-78	0.359817	6.7171e-35	0.517733	1.48078e-76
COL1A1	ENSG00000108821	0.977338	0	0.532614	4.77924e-81	0.598085	1.0913e-107
COL1A2	ENSG00000164692	0.98515	0	0.529777	4.69568e-80	0.620072	7.84396e-118
COL3A1	ENSG00000168542	0.983218	0	0.546481	4.89497e-86	0.6199	9.48232e-118
COL4A2	ENSG00000134871	0.35965	3.8686e-35	0.107743	0.000185315	0.489716	1.5533e-67
COL4A5	ENSG00000188153	0.336256	1.05012e-30	0.18507	3.85682e-10	0.103398	0.000301856
COL4A6	ENSG00000197565	0.335618	1.37106e-30	0.290689	6.24793e-23	0.255192	4.53788e-18
COL5A1	ENSG00000130635	0.953984	0	0.480434	3.26675e-64	0.612262	3.88218e-114
COL5A2	ENSG00000204262	0.951836	0	0.480293	3.59642e-64	0.61585	8.03043e-116
COL5A3	ENSG00000080573	0.784776	4.84641e-230	0.33817	8.1588e-31	0.497907	4.36722e-70
COL6A1	ENSG00000142156	0.854452	5.5395222902862e-314	0.534124	1.40428e-81	0.609777	5.53904e-113
COL6A2	ENSG00000142173	0.805828	9.71403e-252	0.523138	9.07268e-78	0.654183	2.86803e-135
COL6A3	ENSG00000163359	0.929165	0	0.529581	5.49602e-80	0.603044	6.5963e-110
COL7A1	ENSG00000114270	0.448689	9.46689e-56	0.337555	1.05453e-30	0.390361	1.50333e-41
COL8A1	ENSG00000144810	0.793376	1.34307e-238	0.42057	3.58014e-48	0.58345	2.31945e-101
CRP	ENSG00000132693	0.0981418	0.000567546	0.15519	1.34311e-07	0.214548	3.442e-13
CSF1	ENSG00000184371	0.192964	5.79846e-11	0.293709	2.16925e-23	0.338587	3.94757e-31
CTF1	ENSG00000150281	0.0799744	0.00402389	0.272356	2.93309e-20	0.185148	3.23007e-10
CTHRC1	ENSG00000164932	0.751426	2.97689e-200	0.422342	1.3297e-48	0.579727	8.3973e-100
CUBN	ENSG00000107611	0.356139	1.89216e-34	0.364861	6.7454e-36	0.529593	1.23259e-80
CXCL12	ENSG00000107562	0.62417	8.20246e-120	0.591018	9.44972e-104	0.587794	3.32056e-103
CXCL9	ENSG00000138755	0.0733523	0.00754927	0.0636647	0.0178782	0.143547	9.04182e-07
DCN	ENSG00000011465	0.858362	5.85270164063541e-320	0.648508	3.82665e-131	0.685606	1.82384e-153
DHH	ENSG00000139549	0.280291	1.49262e-21	0.338224	7.97911e-31	0.299398	1.86364e-24
DKK1	ENSG00000107984	0.0634945	0.017745	0.155089	1.36767e-07	0.235196	1.48681e-15
DKK2	ENSG00000155011	0.407446	2.0132e-45	0.353878	9.54591e-34	0.296672	4.99253e-24
DLK1	ENSG00000185559	0.0829303	0.00299493	0.208057	2.09229e-12	0.202397	6.61505e-12
DLL1	ENSG00000198719	0.318719	1.26981e-27	0.335513	2.46103e-30	0.386702	9.49358e-41
DLL4	ENSG00000128917	0.367417	1.07404e-36	0.278634	3.75843e-21	0.3976	3.66135e-43
DSCAM	ENSG00000171587	0.196467	2.6219e-11	0.244409	1.45693e-16	0.190327	1.04346e-10
DUSP18	ENSG00000167065	0.196204	2.78422e-11	0.0664111	0.0142455	0.100405	0.000433998
EBI3	ENSG00000105246	0.103885	0.000284293	0.247548	5.89446e-17	0.219398	1.0053e-13
ECM1	ENSG00000143369	0.389362	2.49221e-41	0.149467	3.6666e-07	0.160481	4.54824e-08
EDA	ENSG00000158813	0.14605	5.93245e-07	0.206538	3.01149e-12	0.233759	2.20983e-15
EDIL3	ENSG00000164176	0.641309	1.99275e-128	0.355695	4.26289e-34	0.45423	2.9969e-57
EDN1	ENSG00000078401	0.192702	6.1484e-11	0.288979	1.13088e-22	0.424972	1.22923e-49
EDN2	ENSG00000127129	0.207564	1.9241e-12	0.235776	1.64432e-15	0.315424	4.57763e-27
EFEMP1	ENSG00000115380	0.274076	1.17731e-20	0.36882	1.07835e-36	0.358255	7.28587e-35
EFEMP2	ENSG00000172638	0.72223	7.94085e-178	0.584131	7.86351e-101	0.66963	6.19534e-144
EFNB1	ENSG00000090776	0.195773	3.07199e-11	0.218028	1.78412e-13	0.404811	8.24421e-45
EFNB2	ENSG00000125266	0.232224	3.36471e-15	0.151478	2.58744e-07	0.30258	5.82192e-25
EFNB2	ENSG00000125266	0.232224	3.36471e-15	0.151478	2.58744e-07	0.30258	5.82192e-25
EFNB3	ENSG00000108947	0.203932	4.5995e-12	0.289759	8.63216e-23	0.298903	2.23014e-24
EPGN	ENSG00000182585	0.242539	1.8822e-16	0.0985511	0.000567199	0.183841	4.27415e-10
EREG	ENSG00000124882	0.0625032	0.019234	0.117893	4.85361e-05	0.199586	1.27764e-11
F10	ENSG00000126218	0.408592	1.08637e-45	0.507432	1.47394e-72	0.397985	2.99809e-43
F13A1	ENSG00000124491	0.716645	7.3172e-174	0.492436	7.87443e-68	0.561826	1.39971e-92
FASLG	ENSG00000117560	0.0846164	0.00252041	0.122664	2.48828e-05	0.160319	4.6872e-08
FAT4	ENSG00000196159	0.583435	2.35429e-101	0.464905	9.69604e-60	0.50587	1.23767e-72
FBLN1	ENSG00000077942	0.654798	1.32606e-135	0.546743	3.92166e-86	0.558969	1.81212e-91
FBLN2	ENSG00000163520	0.690758	1.13404e-156	0.525306	1.64769e-78	0.685129	3.58108e-153
FBN1	ENSG00000166147	0.88102	0	0.468379	1.0136e-60	0.602958	7.21248e-110
FCN2	ENSG00000160339	0.242759	1.76723e-16	0.185722	3.35533e-10	0.116505	5.49726e-05
FGB	ENSG00000171564	0.104937	0.00024952	0.130877	7.43402e-06	0.0936313	0.000953171
FGF1	ENSG00000113578	0.569666	1.09048e-95	0.469778	4.05436e-61	0.681158	9.45093e-151
FGF10	ENSG00000070193	0.352088	1.15331e-33	0.246545	7.88031e-17	0.192489	6.44924e-11
FGF11	ENSG00000161958	0.201409	8.34527e-12	0.243861	1.70403e-16	0.289687	5.94148e-23
FGF14	ENSG00000102466	0.541997	4.43908e-85	0.550437	1.67142e-87	0.494728	4.34833e-69
FGF16	ENSG00000196468	0.677938	8.14753e-149	0.470082	3.31985e-61	0.423589	2.69936e-49
FGF18	ENSG00000156427	0.52175	6.40682e-78	0.488842	9.88229e-67	0.406855	2.76582e-45
FGF19	ENSG00000162344	0.0733769	0.00753228	0.0948029	0.000872495	0.0547015	0.0350659
FGF2	ENSG00000138685	0.116072	5.83257e-05	0.260908	1.08522e-18	0.352442	9.8598e-34
FGF20	ENSG00000078579	0.270175	4.18927e-20	0.285672	3.52179e-22	0.160912	4.197e-08
FGF3	ENSG00000186895	0.102313	0.000344689	0.119625	3.81889e-05	0.073154	0.00768762
FGF5	ENSG00000138675	0.290324	4.75361e-23	0.130741	7.58832e-06	0.230946	4.76474e-15
FGF7	ENSG00000140285	0.521901	5.68695e-78	0.572945	3.10513e-96	0.624292	7.14804e-120
FGF9	ENSG00000102678	0.104916	0.000250174	0.27546	1.06904e-20	0.342928	6.23547e-32
FLT3LG	ENSG00000090554	0.158493	6.57105e-08	0.348533	9.91223e-33	0.247847	4.04593e-17
FN1	ENSG00000115414	0.771995	5.02767e-218	0.286803	2.3919e-22	0.510901	2.80663e-74
FST	ENSG00000134363	0.5852	4.22485e-102	0.506659	2.61824e-72	0.555663	3.40158e-90
GAD1	ENSG00000128683	0.19882	1.52611e-11	0.191126	1.03739e-10	0.13517	3.51987e-06
GAS6	ENSG00000183087	0.447702	1.73905e-55	0.492422	7.95237e-68	0.547106	5.78529e-87
GDF10	ENSG00000266524	0.257595	2.18398e-18	0.395038	2.96957e-42	0.343687	4.5036e-32
GDF11	ENSG00000135414	0.216396	2.16089e-13	0.0860549	0.00225204	0.106195	0.00021314
GDF6	ENSG00000156466	0.558292	3.3122e-91	0.392181	1.269e-41	0.412115	1.60509e-46
GDF7	ENSG00000143869	0.1143	7.41636e-05	0.240987	3.85066e-16	0.215967	2.4082e-13
GDNF	ENSG00000168621	0.43933	2.79764e-53	0.19952	1.56354e-11	0.360405	2.74216e-35
GIP	ENSG00000159224	0.320858	5.47712e-28	0.176533	2.28232e-09	0.163485	2.58625e-08
GNAI2	ENSG00000114353	0.304572	2.78873e-25	0.263063	5.57376e-19	0.334684	2.0223e-30
GPC3	ENSG00000147257	0.15972	5.23935e-08	0.162303	3.66004e-08	0.125471	1.54013e-05
GREM1	ENSG00000166923	0.647465	1.17291e-131	0.352209	1.99229e-33	0.526528	1.44732e-79
GRP	ENSG00000134443	0.63782	1.25297e-126	0.422835	1.00857e-48	0.47048	8.25472e-62
HAS2	ENSG00000170961	0.547601	3.78489e-87	0.394387	4.13938e-42	0.520687	1.47654e-77
HBEGF	ENSG00000113070	0.160153	4.83467e-08	0.226014	2.27347e-14	0.322757	2.58171e-28
HDC	ENSG00000140287	0.306047	1.61161e-25	0.307344	1.5572e-25	0.146404	5.58614e-07
HGF	ENSG00000019991	0.550784	2.42902e-88	0.506946	2.11618e-72	0.43151	2.83563e-51
HLA-E	ENSG00000204592	0.122262	2.45306e-05	0.211148	9.8818e-13	0.342202	8.50829e-32
HP	ENSG00000257017	0.164415	2.16696e-08	0.0769197	0.00557394	0.178786	1.23872e-09
HSPG2	ENSG00000142798	0.650614	2.44329e-133	0.366379	3.34976e-36	0.523388	1.75938e-78
ICAM1	ENSG00000090339	0.205313	3.3088e-12	0.170686	7.3419e-09	0.330232	1.26765e-29
ICAM2	ENSG00000108622	0.124716	1.72014e-05	0.28593	3.22487e-22	0.436454	1.55097e-52
ICAM3	ENSG00000076662	0.170089	7.20429e-09	0.222609	5.52628e-14	0.275223	8.07425e-21
ICAM5	ENSG00000105376	0.0749867	0.00649033	0.243877	1.6964e-16	0.349247	4.03221e-33
IGF1	ENSG00000017427	0.434967	3.73575e-52	0.494925	1.34157e-68	0.412873	1.06108e-46
IGF2	ENSG00000167244	0.602902	7.64437e-110	0.519233	1.90077e-76	0.423102	3.55883e-49
IGFBP4	ENSG00000141753	0.363497	6.63538e-36	0.33202	1.03379e-29	0.225414	2.09677e-14
IGFL1	ENSG00000188293	0.244021	1.22979e-16	0.191849	8.84402e-11	0.32027	6.90581e-28
IGFL2	ENSG00000204866	0.479104	2.4817e-64	0.228481	1.18406e-14	0.322695	2.64564e-28
IGFL3	ENSG00000188624	0.487237	8.90655e-67	0.185344	3.63799e-10	0.269412	5.35666e-20
IL10	ENSG00000136634	0.238518	5.88804e-16	0.142566	1.17201e-06	0.229994	6.16549e-15
IL11	ENSG00000095752	0.321693	3.93667e-28	0.250323	2.6204e-17	0.310629	2.8737e-26
IL15	ENSG00000164136	0.0782053	0.00478135	0.191098	1.04399e-10	0.17997	9.68051e-10
IL16	ENSG00000172349	0.458202	2.42547e-58	0.433914	1.78278e-51	0.459324	1.18506e-58
IL17B	ENSG00000127743	0.163295	2.68088e-08	0.329952	2.39692e-29	0.414028	5.6309e-47
IL18	ENSG00000150782	0.0757776	0.00602665	0.155325	1.31096e-07	0.208809	1.42227e-12
IL1B	ENSG00000125538	0.125007	1.64842e-05	0.158394	7.53124e-08	0.250744	1.72135e-17
IL1RN	ENSG00000136689	0.110832	0.000117528	0.0681356	0.0123049	0.092251	0.0011123
IL2	ENSG00000109471	0.0954863	0.000772141	0.211468	9.1377e-13	0.191015	8.95891e-11
IL24	ENSG00000162892	0.171957	4.97375e-09	0.240219	4.77965e-16	0.0889916	0.00158895
IL6	ENSG00000136244	0.0711696	0.009199	0.254933	6.6666e-18	0.327324	4.13509e-29
IL7	ENSG00000104432	0.157015	8.61362e-08	0.217526	2.0253e-13	0.274632	9.80749e-21
INHBA	ENSG00000122641	0.718438	3.99791e-175	0.301985	1.11865e-24	0.505783	1.32114e-72
INHBB	ENSG00000163083	0.200198	1.10786e-11	0.160839	4.80564e-08	0.215374	2.79655e-13
INHBE	ENSG00000139269	0.0536721	0.0377901	0.151656	2.50799e-07	0.189932	1.1387e-10
JAG1	ENSG00000101384	0.34513	2.41903e-32	0.254568	7.43667e-18	0.386376	1.11778e-40
KLK3	ENSG00000142515	0.246955	5.2526e-17	0.389303	5.40141e-41	0.230132	5.94019e-15
L1CAM	ENSG00000198910	0.0497752	0.0497024	0.0609507	0.0222153	0.301881	7.52619e-25
LAMA1	ENSG00000101680	0.486428	1.57014e-66	0.344836	4.87363e-32	0.528276	3.56467e-80
LAMA2	ENSG00000196569	0.649016	1.75381e-132	0.541462	3.33116e-84	0.489486	1.82746e-67
LAMA4	ENSG00000112769	0.769815	4.70253e-216	0.390283	3.30398e-41	0.655657	4.49561e-136
LAMB1	ENSG00000091136	0.74477	7.17559e-195	0.436937	3.03299e-52	0.657077	7.47215e-137
LAMB2	ENSG00000172037	0.346456	1.3624e-32	0.276332	8.03257e-21	0.203804	4.74115e-12
LAMB3	ENSG00000196878	0.191001	8.98729e-11	0.259819	1.51593e-18	0.458632	1.84311e-58
LAMC1	ENSG00000135862	0.516024	5.56001e-76	0.261623	8.70464e-19	0.513497	3.88005e-75
LAMC2	ENSG00000058085	0.123517	2.04732e-05	0.138729	2.18545e-06	0.382349	8.24822e-40
LAMC3	ENSG00000050555	0.233419	2.42638e-15	0.278454	3.98943e-21	0.399342	1.47753e-43
LCN1	ENSG00000160349	0.253407	7.77186e-18	0.0682512	0.0121835	0.259458	1.23246e-18
LEFTY2	ENSG00000143768	0.214302	3.661e-13	0.315866	6.21609e-27	0.417384	8.81099e-48
LEP	ENSG00000174697	0.180797	8.14136e-10	0.151332	2.65411e-07	0.232115	3.46671e-15
LIF	ENSG00000128342	0.274875	9.0546e-21	0.349235	7.30915e-33	0.375749	2.05688e-38
LIPC	ENSG00000166035	0.466264	1.32874e-60	0.372978	1.52958e-37	0.471589	3.94748e-62
LPL	ENSG00000175445	0.274576	9.9899e-21	0.184209	4.63255e-10	0.378265	6.08826e-39
LRP1B	ENSG00000168702	0.190212	1.07023e-10	0.181599	8.02829e-10	0.145717	6.27691e-07
LTA	ENSG00000226979	0.0666066	0.0136917	0.124463	1.92173e-05	0.179172	1.14327e-09
LTBP1	ENSG00000049323	0.291494	3.15099e-23	0.179999	1.12048e-09	0.392037	6.41576e-42
LTBP3	ENSG00000168056	0.241767	2.34699e-16	0.358723	1.09984e-34	0.185413	3.05072e-10
LTF	ENSG00000012223	0.0913928	0.00122312	0.141882	1.31135e-06	0.185456	3.02224e-10
LY86	ENSG00000112799	0.344558	3.09611e-32	0.343022	1.05658e-31	0.373911	4.97248e-38
LYZ	ENSG00000090382	0.161909	3.48221e-08	0.100606	0.000445134	0.234934	1.59866e-15
MBL2	ENSG00000165471	0.232004	3.57355e-15	0.170105	8.22924e-09	0.236647	9.93886e-16
MFAP2	ENSG00000117122	0.611308	1.0799e-113	0.375536	4.53558e-38	0.563155	4.21807e-93
MFAP5	ENSG00000197614	0.717134	3.31629e-174	0.372307	2.10064e-37	0.571496	1.99657e-96
MFGE8	ENSG00000140545	0.291018	3.72573e-23	0.332152	9.79593e-30	0.701842	8.3561e-164
MFNG	ENSG00000100060	0.25136	1.43347e-17	0.360633	4.64446e-35	0.379144	3.96928e-39
MMP13	ENSG00000137745	0.574714	9.80603e-98	0.216613	2.54893e-13	0.364387	4.39838e-36
MMP2	ENSG00000087245	0.885427	0	0.613987	5.11024e-114	0.703395	7.88212e-165
MMP7	ENSG00000137673	0.0870392	0.00195698	0.173582	4.13686e-09	0.402702	2.52453e-44
MUC7	ENSG00000171195	0.108348	0.000162136	0.184362	4.48461e-10	0.212615	5.57542e-13
MYOC	ENSG00000034971	0.161089	4.0605e-08	0.270933	4.63884e-20	0.254244	6.04288e-18
NCAM1	ENSG00000149294	0.333736	2.99737e-30	0.344165	6.49383e-32	0.523071	2.26078e-78
NDP	ENSG00000124479	0.14344	9.20439e-07	0.212482	7.12208e-13	0.15007	2.97074e-07
NGF	ENSG00000134259	0.179924	9.77467e-10	0.259544	1.64929e-18	0.411407	2.36174e-46
NID1	ENSG00000116962	0.787558	9.15295e-233	0.38044	4.27604e-39	0.597613	1.76747e-107
NID2	ENSG00000087303	0.808701	6.5918e-255	0.321192	7.86688e-28	0.518848	6.21945e-77
NLGN1	ENSG00000169760	0.187428	1.9717e-10	0.251248	1.99521e-17	0.25277	9.40977e-18
NLGN2	ENSG00000169992	0.318048	1.65089e-27	0.37192	2.52158e-37	0.26858	6.99852e-20
NLGN3	ENSG00000196338	0.26352	3.48263e-19	0.278157	4.40142e-21	0.179209	1.13451e-09
NODAL	ENSG00000156574	0.108164	0.000166004	0.122381	2.59067e-05	0.163444	2.60614e-08
NPY	ENSG00000122585	0.107221	0.000187228	0.189494	1.48429e-10	0.215877	2.46383e-13
NRG1	ENSG00000157168	0.57777	5.43892e-99	0.484637	1.8348e-65	0.597794	1.46975e-107
NTF3	ENSG00000185652	0.214201	3.7545e-13	0.296532	7.97563e-24	0.387444	6.54504e-41
NTN4	ENSG00000074527	0.322682	2.65984e-28	0.291589	4.56386e-23	0.165865	1.6411e-08
NTNG1	ENSG00000162631	0.162763	2.96497e-08	0.183513	5.36805e-10	0.193935	4.6598e-11
NTNG2	ENSG00000196358	0.607388	6.96648e-112	0.398439	5.1718e-43	0.546276	1.17771e-86
NXPH2	ENSG00000144227	0.145112	6.95363e-07	0.180539	1.00159e-09	0.137506	2.42859e-06
OBP2A	ENSG00000122136	0.246271	6.41039e-17	0.248118	4.9944e-17	0.27474	9.46625e-21
OLFM2	ENSG00000105088	0.257551	2.21361e-18	0.189496	1.48367e-10	0.354209	4.49247e-34
OMG	ENSG00000126861	0.164132	2.28669e-08	0.231203	5.71334e-15	0.174147	3.20387e-09
OSM	ENSG00000099985	0.153709	1.56352e-07	0.113406	8.89501e-05	0.227449	1.22101e-14
OXT	ENSG00000101405	0.438303	5.16622e-53	0.390359	3.18062e-41	0.404647	8.99541e-45
PAPLN	ENSG00000100767	0.340994	1.42409e-31	0.434822	1.0492e-51	0.358156	7.62165e-35
PCSK9	ENSG00000169174	0.41279	1.11002e-46	0.228819	1.08218e-14	0.346501	1.33602e-32
PDGFA	ENSG00000197461	0.280274	1.50108e-21	0.284266	5.68166e-22	0.485953	2.18761e-66
PDGFB	ENSG00000100311	0.249194	2.72346e-17	0.059511	0.0248554	0.237712	7.38119e-16
PDGFC	ENSG00000145431	0.525837	2.51387e-79	0.321817	6.15561e-28	0.451908	1.28338e-56
PDGFD	ENSG00000170962	0.441315	8.49619e-54	0.436426	4.09745e-52	0.379947	2.68197e-39
PENK	ENSG00000181195	0.306134	1.55975e-25	0.377186	2.05858e-38	0.354071	4.77642e-34
PF4	ENSG00000163737	0.0520628	0.0423924	0.118371	4.54422e-05	0.146945	5.09418e-07
PGF	ENSG00000119630	0.284655	3.39041e-22	0.308479	1.01986e-25	0.49772	5.00198e-70
PLAT	ENSG00000104368	0.338892	3.47063e-31	0.250616	2.40378e-17	0.220841	6.93079e-14
PLAU	ENSG00000122861	0.612883	1.99204e-114	0.250005	2.87693e-17	0.55542	4.21566e-90
PLTP	ENSG00000100979	0.284368	3.74054e-22	0.305647	2.91994e-25	0.485024	4.18196e-66
PMCH	ENSG00000183395	0.147518	4.61833e-07	0.146786	5.79539e-07	0.190264	1.05817e-10
PNOC	ENSG00000168081	0.176931	1.81694e-09	0.248113	5.00134e-17	0.330659	1.06425e-29
PRL	ENSG00000172179	0.203112	5.58665e-12	0.0769922	0.00553584	0.186125	2.61636e-10
PRND	ENSG00000171864	0.474728	4.82341e-63	0.337512	1.07386e-30	0.325623	8.20925e-29
PROC	ENSG00000115718	0.372599	9.30356e-38	0.262441	6.75983e-19	0.221246	6.24147e-14
PROK1	ENSG00000143125	0.0965156	0.000685892	0.0771566	0.00545029	0.124683	1.72827e-05
PROS1	ENSG00000184500	0.460027	7.55538e-59	0.505183	7.81111e-72	0.65498	1.05466e-135
PRSS23	ENSG00000150687	0.38805	4.82743e-41	0.217935	1.8268e-13	0.232473	3.14406e-15
PSAP	ENSG00000197746	0.232153	3.43115e-15	0.101353	0.000407163	0.231135	4.52667e-15
PTGS2	ENSG00000073756	0.14799	4.25879e-07	0.302478	9.3468e-25	0.407341	2.13088e-45
PTHLH	ENSG00000087494	0.329129	1.98775e-29	0.265558	2.55718e-19	0.294179	1.21803e-23
PTN	ENSG00000105894	0.346911	1.11805e-32	0.440509	3.65762e-53	0.473628	1.01033e-62
RARRES2	ENSG00000106538	0.619014	2.5178e-117	0.465688	5.84218e-60	0.613938	6.38208e-115
RBP4	ENSG00000138207	0.225563	2.01572e-14	0.138467	2.27892e-06	0.270925	3.28692e-20
RELN	ENSG00000189056	0.273269	1.53341e-20	0.353157	1.31224e-33	0.320247	6.96916e-28
RGMA	ENSG00000182175	0.0863299	0.00210878	0.284657	4.97655e-22	0.432466	1.62205e-51
RNASE2	ENSG00000169385	0.117635	4.70504e-05	0.0626878	0.0193481	0.236226	1.11743e-15
RSPO1	ENSG00000169218	0.431633	2.6383e-51	0.49182	1.21745e-67	0.48142	5.07354e-65
RSPO3	ENSG00000146374	0.28324	5.49743e-22	0.358816	1.05479e-34	0.49705	8.12959e-70
S100A9	ENSG00000163220	0.0743416	0.00689149	0.0534263	0.0390777	0.26549	1.87209e-19
SCGB1A1	ENSG00000149021	0.0570081	0.0295435	0.0521615	0.0427405	0.080483	0.003827
SCGB3A2	ENSG00000164265	0.214683	3.32693e-13	0.115685	6.55724e-05	0.356979	1.29686e-34
SCT	ENSG00000070031	0.510571	3.60319e-74	0.307556	1.43903e-25	0.391744	7.44833e-42
SELPLG	ENSG00000110876	0.35177	1.32769e-33	0.325916	1.21461e-28	0.378146	6.45122e-39
SEMA3A	ENSG00000075213	0.47595	2.11641e-63	0.321496	6.98172e-28	0.412777	1.118e-46
SEMA3C	ENSG00000075223	0.298561	2.52521e-24	0.207547	2.36525e-12	0.0849313	0.00243969
SEMA3D	ENSG00000153993	0.660867	5.90647e-139	0.437964	1.65566e-52	0.568961	2.09235e-95
SEMA3E	ENSG00000170381	0.291405	3.2512e-23	0.186532	2.82018e-10	0.141573	1.25439e-06
SEMA3G	ENSG00000010319	0.223541	3.43247e-14	0.249045	3.81114e-17	0.216297	2.21573e-13
SEMA5A	ENSG00000112902	0.555937	2.6705e-90	0.417204	2.31139e-47	0.46524	2.59505e-60
SEMA6A	ENSG00000092421	0.0923288	0.00110272	0.216347	2.72551e-13	0.145285	6.75356e-07
SEMA6D	ENSG00000137872	0.353303	6.72454e-34	0.356771	2.63861e-34	0.297763	3.36964e-24
SEMA7A	ENSG00000138623	0.273704	1.32989e-20	0.137855	2.51295e-06	0.394834	1.53069e-42
SERPINE1	ENSG00000106366	0.477612	6.85819e-64	0.354648	6.78621e-34	0.460145	7.00209e-59
SERPINE2	ENSG00000135919	0.294837	9.63245e-24	0.362521	1.96943e-35	0.547304	4.88471e-87
SERPING1	ENSG00000149131	0.54958	6.8859e-88	0.517838	5.58269e-76	0.667089	1.7931e-142
SHANK1	ENSG00000161681	0.728831	1.22091e-182	0.442054	1.45279e-53	0.462142	1.93749e-59
SLIT2	ENSG00000145147	0.625161	2.69337e-120	0.515549	3.23276e-75	0.509529	7.92888e-74
SLIT3	ENSG00000184347	0.683756	2.48632e-152	0.532587	4.88373e-81	0.580746	3.15843e-100
SORBS1	ENSG00000095637	0.332721	4.5595e-30	0.248031	5.12217e-17	0.399019	1.74879e-43
SOST	ENSG00000167941	0.176977	1.79977e-09	0.14227	1.23047e-06	0.264259	2.76121e-19
SPINK1	ENSG00000164266	0.107077	0.000190672	0.0633029	0.0184111	0.276903	4.63188e-21
SPON2	ENSG00000159674	0.559028	1.71861e-91	0.412612	2.84617e-46	0.504554	3.29843e-72
SST	ENSG00000157005	0.120055	3.35673e-05	0.214704	4.10924e-13	0.115142	6.61896e-05
TAC1	ENSG00000006128	0.324541	1.26708e-28	0.435216	8.32976e-52	0.317353	2.16457e-27
TCN2	ENSG00000185339	0.0961899	0.00071217	0.159652	5.98282e-08	0.340965	1.44185e-31
TFPI	ENSG00000003436	0.360281	2.90212e-35	0.373233	1.35579e-37	0.463554	7.76646e-60
TG	ENSG00000042832	0.188758	1.47439e-10	0.111981	0.00010735	0.121612	2.69171e-05
TGFB1	ENSG00000105329	0.526223	1.84724e-79	0.449722	1.38745e-55	0.46537	2.38393e-60
TGFB2	ENSG00000092969	0.413837	6.25459e-47	0.331754	1.15257e-29	0.410006	5.05848e-46
TGFB3	ENSG00000119699	0.623237	2.32914e-119	0.465246	7.7752e-60	0.315953	3.72953e-27
TGM2	ENSG00000198959	0.230959	4.74819e-15	0.20033	1.29697e-11	0.295236	8.35171e-24
THBS1	ENSG00000137801	0.482382	2.61355e-65	0.243916	1.67745e-16	0.383352	5.02785e-40
THBS2	ENSG00000186340	0.882628	0	0.482452	8.23957e-65	0.645748	9.50195e-131
TIMP1	ENSG00000102265	0.110176	0.000128031	0.202889	7.14453e-12	0.241259	2.71235e-16
TIMP2	ENSG00000035862	0.838866	8.58226e-292	0.539798	1.32961e-83	0.74532	2.6136e-195
TIMP3	ENSG00000100234	0.582984	3.64326e-101	0.275588	1.02523e-20	0.392167	6.00273e-42
TNC	ENSG00000041982	0.413871	6.13907e-47	0.312598	2.16453e-26	0.463429	8.4272e-60
TNFSF10	ENSG00000121858	0.147996	4.25408e-07	0.105214	0.000254344	0.067834	0.0123278
TNFSF11	ENSG00000120659	0.425661	8.29309e-50	0.356886	2.50634e-34	0.417083	1.0416e-47
TNFSF12	ENSG00000239697	0.242376	1.97245e-16	0.400281	1.99053e-43	0.316717	2.77261e-27
TNFSF13B	ENSG00000102524	0.187674	1.86877e-10	0.142242	1.23614e-06	0.317165	2.32915e-27
TNFSF14	ENSG00000125735	0.145293	6.74375e-07	0.180407	1.0294e-09	0.266754	1.25384e-19
TNFSF15	ENSG00000181634	0.187428	1.97176e-10	0.209427	1.50246e-12	0.257487	2.25755e-18
TNFSF18	ENSG00000120337	0.0681828	0.0119623	0.11689	5.56751e-05	0.134189	4.10603e-06
TNFSF4	ENSG00000117586	0.578082	4.04112e-99	0.230053	7.78187e-15	0.349121	4.26093e-33
TNFSF8	ENSG00000106952	0.310682	2.81689e-26	0.251578	1.80999e-17	0.305858	1.72927e-25
TNFSF9	ENSG00000125657	0.278761	2.4941e-21	0.152169	2.29278e-07	0.339562	2.61489e-31
TSHB	ENSG00000134200	0.226075	1.76018e-14	0.249531	3.30623e-17	0.252419	1.04506e-17
TSLP	ENSG00000145777	0.140871	1.40765e-06	0.330594	1.84781e-29	0.40173	4.21699e-44
UCN2	ENSG00000145040	0.368231	7.33432e-37	0.240942	3.8999e-16	0.37489	3.11004e-38
UTS2	ENSG00000049247	0.0868295	0.00200079	0.101855	0.000383313	0.158838	6.16718e-08
UTS2B	ENSG00000188958	0.0592772	0.0248344	0.130716	7.61743e-06	0.248988	2.89383e-17
VCAM1	ENSG00000162692	0.305513	1.96594e-25	0.254365	7.90403e-18	0.439327	2.80256e-53
VCAN	ENSG00000038427	0.851276	0	0.467369	1.95944e-60	0.585135	4.49985e-102
VEGFB	ENSG00000173511	0.224165	2.91355e-14	0.266203	2.08759e-19	0.237958	6.88897e-16
VEGFC	ENSG00000150630	0.51754	1.71915e-76	0.401097	1.30132e-43	0.544618	4.83509e-86
VIM	ENSG00000026025	0.491836	3.44697e-68	0.447306	6.08275e-55	0.761074	2.30278e-208
VIP	ENSG00000146469	0.109518	0.000139457	0.19851	1.97225e-11	0.111309	0.000110401
VWF	ENSG00000110799	0.417437	8.55513e-48	0.332248	9.42069e-30	0.415653	2.29972e-47
WNT1	ENSG00000125084	0.0902522	0.00138605	0.18534	3.64157e-10	0.111247	0.000111308
WNT11	ENSG00000085741	0.179488	1.0705e-09	0.219101	1.35915e-13	0.305546	1.94198e-25
WNT16	ENSG00000002745	0.0681513	0.011995	0.179347	1.28211e-09	0.1654	1.79463e-08
WNT2	ENSG00000105989	0.638466	5.84069e-127	0.36631	3.45771e-36	0.532284	1.3881e-81
WNT3A	ENSG00000154342	0.0585327	0.0263048	0.0700337	0.0104377	0.0931567	0.00100537
WNT5A	ENSG00000114251	0.504856	2.63475e-72	0.286684	2.4919e-22	0.363882	5.55621e-36
WNT7A	ENSG00000154764	0.123461	2.06402e-05	0.200933	1.12765e-11	0.220963	6.71517e-14
WNT7B	ENSG00000188064	0.296536	5.24234e-24	0.0890148	0.00164849	0.0627929	0.0187882

## Sheet: Table S4
Table S4. The results of Cox proportional hazards model among 106 candidate cytokines.
	Coeffcient	Hazard ratio	P value
A2M	-0.273651	0.760597	0.101247
ADAM12	0.180413	1.19771	0.273198
ADAM23	-0.0377946	0.962911	0.816908
ANGPT4	0.0135203	1.01361	0.934459
ANGPTL1	-0.182488	0.833194	0.270747
ANGPTL2	-0.0022164	0.997786	0.989158
ANXA1	-0.263536	0.76833	0.110055
BGN	0.0578971	1.05961	0.72253
BST1	-0.104826	0.900481	0.523748
C1QTNF1	-0.146216	0.863971	0.370964
CD34	-0.0613552	0.940489	0.708648
CFH	0.0613694	1.06329	0.711369
CLEC11A	-0.0316066	0.968888	0.846933
CNTN4	-0.0346829	0.965912	0.831843
COL14A1	-0.233801	0.79152	0.157114
COL18A1	0.127466	1.13595	0.437162
COL1A1	0.0881921	1.0922	0.591368
COL1A2	0.16504	1.17944	0.313977
COL3A1	0.240795	1.27226	0.141864
COL5A1	0.14511	1.15617	0.375179
COL5A2	0.194348	1.21452	0.23639
COL5A3	0.16217	1.17606	0.324152
COL6A1	0.0953617	1.10006	0.559388
COL6A2	0.0113492	1.01141	0.94466
COL6A3	0.134552	1.14402	0.415763
COL7A1	-0.0716634	0.930844	0.661856
COL8A1	0.149693	1.16148	0.359487
CTHRC1	0.175632	1.192	0.281478
CUBN	0.0279105	1.0283	0.86436
CXCL12	-0.120552	0.886431	0.463472
DCN	-0.124565	0.882881	0.451659
DLL1	-0.137638	0.871414	0.402512
EDIL3	0.359109	1.43205	0.0283292
EFEMP2	-0.0211354	0.979086	0.897259
F10	-0.162451	0.850058	0.320104
F13A1	-0.0165432	0.983593	0.9196
FAT4	0.0612372	1.06315	0.711751
FBLN1	-0.0361373	0.964508	0.824968
FBLN2	-0.109395	0.896376	0.50378
FBN1	0.198497	1.21957	0.228211
FGF1	-0.217717	0.804353	0.186268
FGF14	0.0543978	1.0559	0.739029
FGF16	0.231485	1.26047	0.156898
FGF18	0.016426	1.01656	0.920027
FGF7	0.0764494	1.07945	0.64213
FST	-0.061163	0.94067	0.707766
GAS6	-0.132762	0.875674	0.418132
GDF6	-0.222618	0.80042	0.173862
GREM1	0.247561	1.2809	0.130642
GRP	-0.32385	0.723359	0.0511185
HAS2	-0.107556	0.898027	0.512227
HGF	-0.0487647	0.952405	0.7691
HSPG2	0.00961925	1.00967	0.953764
IGF1	-0.0602621	0.941518	0.713367
IGF2	-0.126738	0.880965	0.437754
IL16	-0.367363	0.692558	0.0285853
INHBA	0.173194	1.1891	0.288987
LAMA1	-0.0254797	0.974842	0.875852
LAMA2	-0.0892975	0.914573	0.588267
LAMA4	0.183373	1.20126	0.263004
LAMB1	-0.0985387	0.906161	0.55098
LIPC	0.20809	1.23132	0.207594
LY86	-0.20509	0.814574	0.217736
MFAP2	0.153703	1.16614	0.346227
MFAP5	0.122715	1.13056	0.452915
MMP2	0.0746023	1.07746	0.648359
NCAM1	0.197471	1.21832	0.22813
NID1	0.0650944	1.06726	0.691141
NID2	0.00892524	1.00897	0.956658
NRG1	-0.156018	0.855544	0.339364
NTNG2	0.248025	1.28149	0.130756
OXT	-0.287168	0.750386	0.083007
PAPLN	-0.203313	0.816023	0.213336
PDGFC	-0.0855242	0.918031	0.603126
PDGFD	-0.0160178	0.98411	0.922018
PENK	0.0718591	1.0745	0.661113
PRND	0.0147758	1.01489	0.92797
PROS1	-0.29586	0.743892	0.0748096
PTN	-0.327755	0.72054	0.0463751
RARRES2	0.179331	1.19642	0.272744
RSPO1	-0.0795697	0.923514	0.625952
SCT	0.0309071	1.03139	0.849743
SELPLG	-0.196649	0.821479	0.23711
SEMA3A	0.0320788	1.0326	0.844081
SEMA3D	-0.0148104	0.985299	0.92776
SEMA5A	-0.0661006	0.936037	0.687549
SERPINE1	0.182251	1.19992	0.2678
SERPING1	-0.259399	0.771515	0.11711
SHANK1	-0.159192	0.852832	0.336442
SLIT2	-0.0309283	0.969545	0.8522
SLIT3	0.0914252	1.09573	0.576257
SPON2	-0.212377	0.80866	0.199509
TAC1	-0.343444	0.709323	0.0371982
TFPI	-0.00955435	0.990491	0.953477
TGFB1	-0.192648	0.824772	0.247701
TGFB2	-0.125801	0.88179	0.441063
TGFB3	-0.0253134	0.975004	0.877306
THBS2	0.192418	1.21218	0.239805
TIMP2	-0.0103228	0.98973	0.950028
TNC	-0.23396	0.791394	0.152705
TNFSF11	-0.281412	0.754718	0.0861349
VCAN	0.179692	1.19685	0.273107
VEGFC	0.0022553	1.00226	0.988966
VIM	-0.172659	0.841425	0.290796
VWF	0.0835675	1.08716	0.61338
WNT2	0.0333354	1.0339	0.838335
